**A-827 Room A, 10/16/2000 9:00 AM - 11:00 AM (PS)**  
**Local Anesthetic Inhibition of Lysophosphatidate Signaling Is Mediated by Interference with  $G_{\alpha q}$  Protein Function** Markus W. Hollmann, MD; Katrin Wiczorek, MS; Marcel E. Durieux, MD, PhD, Department of Anesthesiology, University of Virginia, Charlottesville, VA, United States. LA specifically interact with  $G_{\alpha q}$  (but not  $G_{\alpha o}$ ) protein  $\alpha$  subunits.

**A-828 Room A, 10/16/2000 9:00 AM - 11:00 AM (PS)**  
**Time-Dependent Inhibition of Lysophosphatidate and Thromboxane Signaling by Local Anesthetics** Markus W. Hollmann, MD; Andreas Berger, MS; Christian W. Hoenemann, MD; Marcel E. Durieux, MD, PhD, Dept. of Anesthesiology, University of Virginia, Charlottesville, VA, United States. LA inhibit G protein-coupled receptors time-dependently, explaining in part divergent findings of in vivo and in vitro studies.

**A-829 Room A, 10/16/2000 9:00 AM - 11:00 AM (PS)**  
**Local Anesthetics Inhibit Neutrophil Priming** Niko Jelacin, MS; Markus W. Hollmann, MD; Ariane Gross, MS; Marcel E. Durieux, MD, PhD, Department of Anesthesiology, University of Virginia, Charlottesville, VA, United States. Local anesthetics interfere with neutrophil priming by platelet-activating factor, thereby reducing subsequent respiratory burst.

**A-830 Room A, 10/16/2000 9:00 AM - 11:00 AM (PS)**  
**Continuous Ambulatory Interscalene Block with a New Catheter Insertion System and a Infusion Pump** Stephen M. Klein, MD; Stuart A. Grant, MB ChB, FRCA; Roy A. Greengrass, MD FRCP; Karen C. Nielsen, MD; Susan M. Steele, MD, Anesthesiology, Duke University Medical Center, Durham, NC, United States. Good analgesia and catheter success was achieved with a new catheter system and a disposable pump delivering 0.2% ropivacaine at 10ml/h.

**A-831 Room A, 10/16/2000 9:00 AM - 11:00 AM (PS)**  
**Intravenous Bolus of Ropivacaine Provides a Reliable Indication of Intravascular Injection in the Premedicated Patient** Colin J.L. McCartney, MBChB FRCA; Damian B. Murphy, MD FFARCSI; Anna Iagounova, MD; Vincent W.S. Chan, MD FRCPC, Anesthesia, Toronto Hospital, Toronto, ON, Canada. An intravenous bolus of ropivacaine 60mg in the presence of midazolam produces consistent mild symptoms and no major toxic CVS or CNS effects.

**A-832 Room A, 10/16/2000 9:00 AM - 11:00 AM (PS)**  
**Effects of Lidocaine on Excitability and Intracellular Calcium Concentration in the RPeD1 Neuron of *Lymnaea stagnalis*** Shin Onizuka, M.D.; Toshiharu Kasaba, M.D.; Toshiro Hamakawa, M.D.; Mayumi Takasaki, M.D., Anesthesiology, Miyazaki Medical College, Miyazaki, Japan. Lidocaine stimulates the RPeD1 neuron at low doses irrespective of the voltage dependent calcium channel.

**A-833 Room A, 10/16/2000 9:00 AM - 11:00 AM (PS)**  
**Differences in Sensitivity to Local Anesthetics of Muscarinic m1 and m3 Receptors** Carsten H. Ritter, MS; Markus W. Hollmann, MD; Marcel E. Durieux, MD, PhD, Department of Anesthesiology, University of Virginia, Charlottesville, VA, United States. Despite a high degree of homology muscarinic m1 and m3 receptors are differentially inhibited by local anesthetics.

**A-834 Room A, 10/16/2000 9:00 AM - 11:00 AM (PS)**  
**Pharmacokinetics of Ropivacaine after Brachial Plexus Blockade in Patients with Chronic Renal Failure** Fabienne A. Roelants, MD; Guy Muller, MD; Francois Singelyn, MD, PhD; Roger K. Verbeeck; Luc J. Van Obbergh, MD, PhD, Anesthesiology, Université Catholique de Louvain, Brussels, Belgium. Chronic renal failure does not modify the pharmacokinetic properties of ropivacaine.

**A-835 Room A, 10/16/2000 9:00 AM - 11:00 AM (PS)**  
**Effects of Lateral Decubitus Position on Spinal Tetracaine in 7.5% or 0.75% Glucose** Yasuko Sakaguchi, MD; Shinichi Sakura, MD; Tomomune Kishimoto, MD; Yoji Saito, MD, Dept of Anesthesiology, Shimane Medical Univ, Izumo, Japan. Marginally hyperbaric spinal tetracaine was not preferentially distributed to the dependent side in patients in the lateral decubitus position.

**A-836 Room A, 10/16/2000 9:00 AM - 11:00 AM (PS)**  
**Pre-Clinical Assessment of New Local Anesthetics Obtained through the Manipulation of the Enantiomeric Ratio of Bupivacaine on Central Nervous System of the Rat** Maria P.B. Simonetti, MD, PhD; Ronald A. Bird, Institute Biomedical Science - University of Sao Paulo, Sao Paulo, SP, Brazil. S10R and S20R do not increase toxicity on rat central nervous system.

**A-837 Room A, 10/16/2000 9:00 AM - 11:00 AM (PS)**  
**Effects of Local Anesthetics on L-arginine Transport in Cultured Bovine Aortic Endothelial Cells** Kazumi Takaisi, D.D.S.; Shigemasa Tomioka, D.D.S., PhD; Nobuyoshi Nakajo, D.D.S., Ph. D., Dental Anesthesiology, Tokushima University Dental Hospital, Tokushima, Tokushima, Japan. Procaine and lidocaine inhibited the L-arginine transport in bovine aortic endothelial cells.

**A-838 Room A, 10/16/2000 9:00 AM - 11:00 AM (PS)**  
**Is Sodium Bisulfite Neurotoxic?** Masahiko Taniguchi, MD; Andrew W. Bollen, DVM, MD; Kenneth Drasner, MD, Anesthesia and Perioperative Care, University of California, San Francisco, CA, United States. The neurotoxicity of intrathecally administered chloroprocaine with sodium bisulfite was less than that of chloroprocaine without sodium bisulfite.

**A-839 Room A, 10/16/2000 9:00 AM - 11:00 AM (PS)**  
**Effects of Clonidine and the Association of Clonidine with Local Anesthetics in Peripheral Nerve of Rat** Emilia A. Valinetti; Maria P.B. Simonetti, Institute of Biomedical Science - University of Sao Paulo, Sao Paulo, SP, Brazil. The results of this basic study on rat sciatic nerve reproduce the advantages obtained with the association clonidine/local anesthetic in humans.

**A-840 Room A, 10/16/2000 9:00 AM - 11:00 AM (PS)**  
**Epinephrine Does Not Prolong the Analgesia of 20 ml Ropivacaine 0.5% or 0.2% in Femoral Plexus Block** A. Weber, MD; R. Fournier, MD; E. Van Gessel, MD; N. Riand, MD; Z. Gamulin, MD, Division of Anesthesiology, University Hospitals, Geneva, Switzerland. After total knee replacement, femoral block analgesia with 20 ml ropivacaine 0.5% or 0.2% is not improved by the addition of epinephrine 1:200000.
